# Supplementary material
Source: ML conference proceedings conference paper supplement (https://proceedings.neurips.cc/paper_files/paper/2015/hash/97d98119037c5b8a9663cb21fb8ebf47-Abstract.html)
Supplement: Supplementary file [file 97d98119037c5b8a9663cb21fb8ebf47-Supplemental.zip]

## 6 Supplement

**Proposition 2.** With probability  $1 - \delta$  the expected cost of executing a stochastic policy with parameters  $\xi \sim \pi(\cdot|\nu)$  is bounded according to:

$$\mathcal{J}(\nu) \leq \inf_{\alpha > 0} \left\{ \hat{\mathcal{J}}_\alpha(\nu) + \frac{\alpha}{2L} \sum_{i=0}^{L-1} b_i^2 e^{D_2(\pi(\cdot|\nu) || \pi(\cdot|\nu_i))} + \frac{1}{\alpha LM} \log \frac{1}{\delta} \right\}, \quad (14)$$

where  $\hat{\mathcal{J}}_\alpha(\nu)$  denotes a robust estimator defined by

$$\hat{\mathcal{J}}_\alpha(\nu) \triangleq \frac{1}{\alpha L} \sum_{i=0}^{L-1} \frac{1}{M} \sum_{j=1}^M \psi(\alpha \ell_i(z_j, \nu)),$$

computed after  $L$  iterations, with  $M$  samples  $z_1, \dots, z_M \sim p(\cdot|\nu_i)$  obtained at every iteration  $i = 0, \dots, L-1$ , and where

$$\psi(x) = \log \left( 1 + x + \frac{1}{2} x^2 \right),$$

while  $D_\beta(p||q)$  denotes the Renyii divergence between  $p$  and  $q$  defined by

$$D_\beta(p||q) = \frac{1}{\beta - 1} \log \int \frac{p^\beta(x)}{q^{\beta-1}(x)} dx.$$

The constants  $b_i$  are such that  $J(\tau) \leq b_i$  at each iteration  $i = 0, \dots, L-1$ .

*Proof.* Let  $z = (\tau, \xi)$  and define  $\ell_i(z, \nu) = J(\tau) \frac{\pi(\xi|\nu)}{\pi(\xi|\nu_i)}$ . The expected value can be equivalently expressed as

$$\mathcal{J}(\nu) \equiv \frac{1}{L} \sum_{i=0}^{L-1} \mathbb{E}_{z \sim p(\cdot|\nu_i)} \ell_i(z, \nu)$$

where  $\nu_i$  are the computed hyperparamters at each iteration  $i = 0, \dots, L-1$ . The bound is obtained by relating the mean to its robust estimate according to

$$\begin{aligned} & \mathbb{P} \left( LM(\mathcal{J}(\nu) - \hat{\mathcal{J}}_\alpha(\nu)) \geq t \right) \\ &= \mathbb{P} \left( e^{\alpha LM(\mathcal{J}(\nu) - \hat{\mathcal{J}}_\alpha(\nu))} \geq e^{\alpha t} \right), \\ &\leq \mathbb{E} \left[ e^{\alpha LM(\mathcal{J}(\nu) - \hat{\mathcal{J}}_\alpha(\nu))} \right] e^{-\alpha t}, \\ &= e^{-\alpha t + \alpha LM \mathcal{J}(\nu)} \mathbb{E} \left[ e^{\sum_{i=0}^{L-1} \sum_{j=1}^M -\psi(\alpha \ell_i(z_j, \nu))} \right] \end{aligned} \quad (15)$$

$$\begin{aligned} &= e^{-\alpha t + \alpha LM \mathcal{J}(\nu)} \mathbb{E} \left[ \prod_{i=0}^{L-1} \prod_{j=1}^M e^{-\psi(\alpha \ell_i(z_j, \nu))} \right] \\ &= e^{-\alpha t + \alpha LM \mathcal{J}(\nu)} \prod_{i=0}^{L-1} \prod_{j=1}^M \mathbb{E}_{z \sim p(\cdot|\nu_i)} \left[ 1 - \alpha \ell_i(z, \nu) + \frac{\alpha^2}{2} \ell_i(z, \nu)^2 \right] \end{aligned} \quad (16)$$

$$\begin{aligned} &= e^{-\alpha t + \alpha LM \mathcal{J}(\nu)} \prod_{i=0}^{L-1} \prod_{j=1}^M \left( 1 - \alpha \mathcal{J}(\nu) + \frac{\alpha^2}{2} \mathbb{E}_{z \sim p(\cdot|\nu_i)} [\ell_i(z, \nu)^2] \right) \\ &\leq e^{-\alpha t + \alpha LM \mathcal{J}(\nu)} \prod_{i=0}^{L-1} \prod_{j=1}^M e^{-\alpha \mathcal{J}(\nu) + \frac{\alpha^2}{2} \mathbb{E}_{z \sim p(\cdot|\nu_i)} [\ell_i(z, \nu)^2]} \\ &\leq e^{-\alpha t + M \frac{\alpha^2}{2} \sum_{i=0}^{L-1} \mathbb{E}_{z \sim p(\cdot|\nu_i)} [\ell_i(z, \nu)^2]}, \end{aligned} \quad (17)$$

using Markov's inequality to obtain (15), the identities  $\psi(x) \geq -\log(1 - x + \frac{1}{2}x^2)$  in (16) and  $1 + x \leq e^x$  in (17). The key step to handle the possibly unbounded ratio and obtain a practical bound was the use of the robust transformation  $\psi(\cdot)$  as proposed by Catoni [25]. These results are then combined with

$$\mathbb{E} [\ell_i(z, \nu)^2] \leq b_i^2 \mathbb{E}_{\pi(\cdot|\nu_i)} \left[ \frac{\pi(\xi|\nu)^2}{\pi(\xi|\nu_i)^2} \right] = b_i^2 e^{D_2(\pi||\pi_i)},$$

where the relationship between the likelihood ratio variance and the Renyii divergence was established in [24].  $\square$
